# Supplementary material
Source: publisher figshare collection journal article supplement (https://frontiersin.figshare.com/ndownloader/files/17852945)
Supplement: Supplementary file [file 17852945]

**Table S1:** *Streptomyces* genome sequences employed in this study, obtained from the GenBank database when indicated. The isolation source is discriminated as marine and non-marine environment.

| Organism name                                                | GenBank accession number | Source     |
|--------------------------------------------------------------|--------------------------|------------|
| <i>Streptomyces alboflavus</i> strain MDJK44                 | CP021748.1               | Non-marine |
| <i>Streptomyces albus</i> strain BK3-25                      | NZ_CP016825.1            | Non-marine |
| <i>Streptomyces albus</i> strain DSM 41398                   | NZ_CP010519.1            | Non-marine |
| <i>Streptomyces albus</i> J1074                              | NC_020990.1              | Non-marine |
| <i>Streptomyces globisporus</i> C-1027                       | CP013738.1               | Non-marine |
| <i>Streptomyces griseus</i> subsp. <i>griseus</i> NBRC 13350 | NC_010572.1              | Non-marine |
| <i>Streptomyces</i> sp. PAMC26508                            | NC_021055.1              | Non-marine |
| <i>Streptomyces pratensis</i> ATCC 33331                     | CP002475.1               | Non-marine |
| <i>Streptomyces sampsonii</i> strain KJ40                    | NZ_CP016824.1            | Non-marine |
| <i>Streptomyces avermitilis</i> MA-4680                      | BA000030.4               | Non-marine |
| <i>Streptomyces bingchengensis</i> BCW-1                     | CP002047.1               | Non-marine |
| <i>Streptomyces cattleya</i> DSM 46488                       | CP003219.1               | Non-marine |
| <i>Streptomyces coelicolor</i> A3(2)                         | AL645882.2               | Non-marine |
| <i>Streptomyces collinus</i> Tu 365                          | CP006259.1               | Non-marine |
| <i>Streptomyces glaucescens</i> strain GLA.O                 | CP009438.1               | Non-marine |
| <i>Streptomyces</i> sp. SirexAA-E                            | NC_015953.1              | Non-marine |
| <i>Streptomyces leeuwenhoekii</i>                            | LN831790.1               | Non-marine |
| <i>Streptomyces lincolnensis</i> strain NRRL 2936            | CP016438.1               | Non-marine |

|                                                                        |                 |            |
|------------------------------------------------------------------------|-----------------|------------|
| <i>Streptomyces noursei</i> ATCC 11455                                 | CP011533.1      | Non-marine |
| <i>Streptomyces rimosus</i> subsp. <i>rimosus</i> strain NRRL ISP-5260 | NYR01000001.1   | Non-marine |
| <i>Streptomyces scabiei</i> 87.22                                      | FN554889.1      | Non-marine |
| <i>Streptomyces venezuelae</i> strain ATCC 15439                       | CP013129.1      | Non-marine |
| <i>Streptomyces vietnamensis</i> strain GIM4.0001                      | CP010407.1      | Non-marine |
| <i>Streptomyces</i> sp. 13-12-16                                       | NCTE01000967.1  | Marine     |
| <i>Streptomyces</i> sp. CNQ-509                                        | CP011492.1      | Marine     |
| <i>Streptomyces</i> sp. DUT11                                          | CP025511.1      | Marine     |
| <i>Streptomyces</i> sp. GBA 94-10                                      | CM002271.1      | Marine     |
| <i>Streptomyces</i> sp. PVA 94-07                                      | CM002273.1      | Marine     |
| <i>Streptomyces</i> sp. RV15                                           | KQ949075.1      | Marine     |
| <i>Streptomyces</i> sp. S063                                           | CP021707.1      | Marine     |
| <i>Streptomyces</i> sp. SCSIO 03032                                    | CP021121.1      | Marine     |
| <i>Streptomyces xinghaiensis</i> S187                                  | CP023202.1      | Marine     |
| <i>Streptomyces</i> sp. B188M101                                       | GCA_002910985.1 | Marine     |
| <i>Streptomyces</i> sp. B226SN101                                      | GCA_002910935.1 | Marine     |
| <i>Streptomyces</i> sp. B226SN104                                      | Not deposited   | Marine     |
| <i>Streptomyces</i> sp. FMC008                                         | Not deposited   | Marine     |
| <i>Streptomyces</i> sp. SM1                                            | GCA_002910825.1 | Marine     |
| <i>Streptomyces</i> sp. SM3                                            | Not deposited   | Marine     |
| <i>Streptomyces</i> sp. SM4                                            | Not deposited   | Marine     |

|                              |                 |        |
|------------------------------|-----------------|--------|
| <i>Streptomyces</i> sp. SM5  | GCA_002910895.1 | Marine |
| <i>Streptomyces</i> sp. SM6  | Not deposited   | Marine |
| <i>Streptomyces</i> sp. SM7  | Not deposited   | Marine |
| <i>Streptomyces</i> sp. SM8  | GCA_000299175.2 | Marine |
| <i>Streptomyces</i> sp. SM9  | GCA_002910795.1 | Marine |
| <i>Streptomyces</i> sp. SM10 | GCA_002910915.1 | Marine |
| <i>Streptomyces</i> sp. SM11 | GCA_002910905.1 | Marine |
| <i>Streptomyces</i> sp. SM12 | GCA_002910855.1 | Marine |
| <i>Streptomyces</i> sp. SM13 | GCA_002910875.1 | Marine |
| <i>Streptomyces</i> sp. SM14 | GCA_002910755.1 | Marine |
| <i>Streptomyces</i> sp. SM17 | GCA_002910725.2 | Marine |
| <i>Streptomyces</i> sp. SM18 | GCA_002910775.2 | Marine |
| <i>Streptomyces</i> sp. SM19 | Not deposited   | Marine |

---
